# Supplementary material for: Increased Circulating Levels of Interleukin-6 Affect the Redox Balance in Skeletal Muscle
Source: Hindawi journal article supplement (doi:10.1155/2019/3018584), 2019-11-16
Supplement: f1 [file 3018584.f1.pdf]

## *Supplementary Materials*

### **Increased circulating levels of Interleukin-6 affect the redox balance in skeletal muscle**

Laura Forcina, Carmen Miano, Bianca M. Scicchitano, Emanuele Rizzuto, Maria Grazia Berardinelli, Fabrizio De Benedetti, Laura Pelosi, and Antonio Musarò

**Correspondence:** Antonio Musarò; DAHFMO-Unit of Histology and Medical Embryology, Sapienza University of Rome. Via A. Scarpa, 14 Rome 00161, Italy.

E-mail: [antonio.musaro@uniroma1.it](mailto:antonio.musaro@uniroma1.it)

**Supplementary Figure 1.**

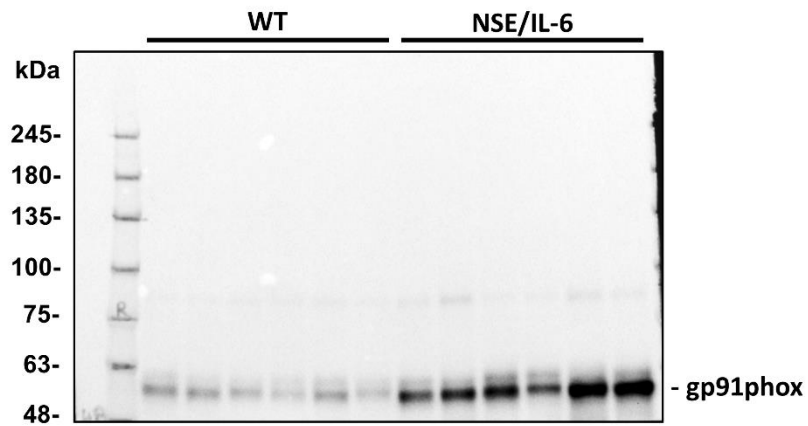

(a)

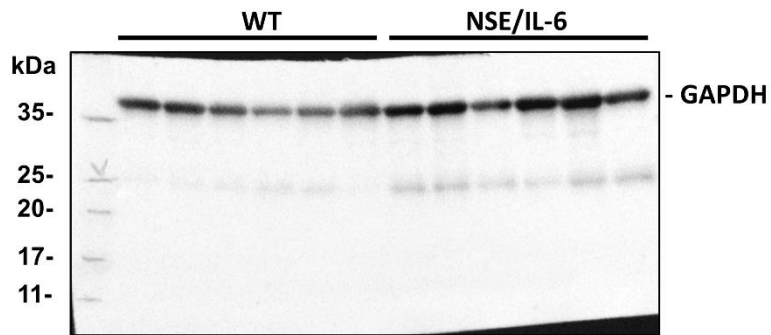

(b)

**Figure S1.** Western Blot analysis of gp91phox (a) and GAPDH (b) proteins in wild type (WT) and NSE/IL-6 transgenic mice. Cropped bands reported as representative images are shown in Figure 1(a).

Supplementary Figure 2.

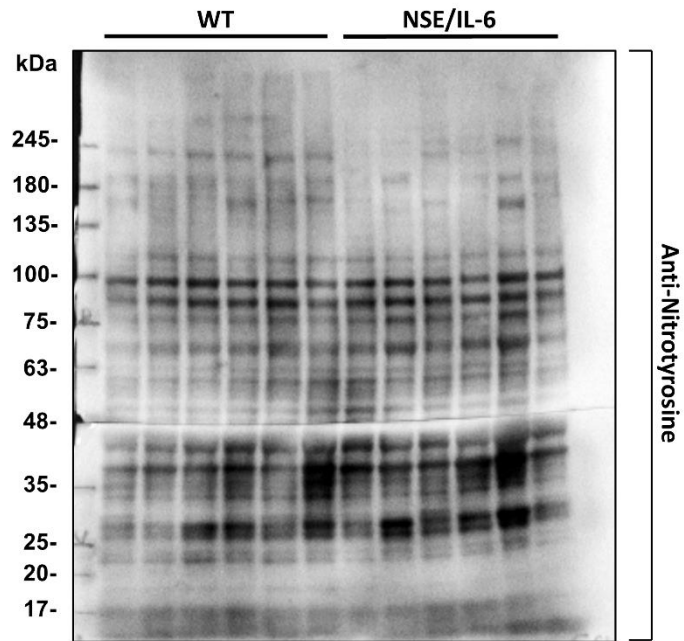

(a)

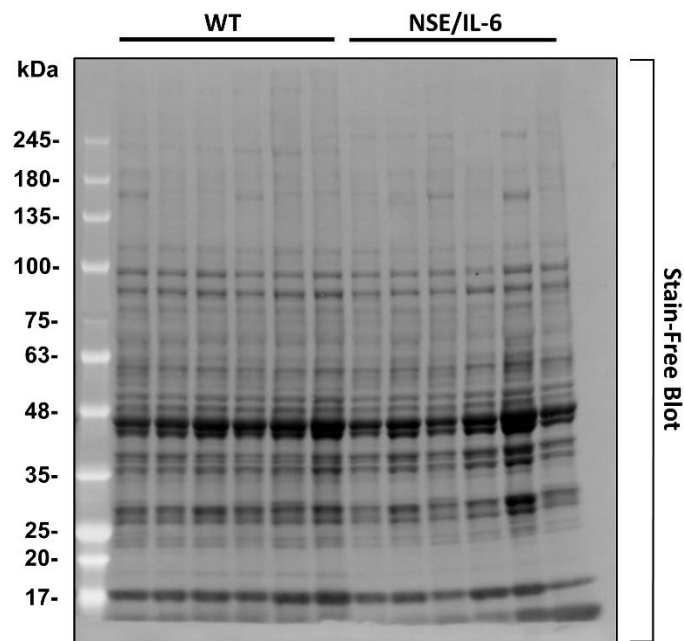

(b)

**Figure S2.** Western Blot analysis of nitrotyrosinated proteins (a) in wild type (WT) and NSE/IL-6 transgenic mice. Stain Free blot image (b) was used as control for protein loading. Selected lanes, reported as representative images, are shown in Figure 1(c).

Supplementary Figure 3.

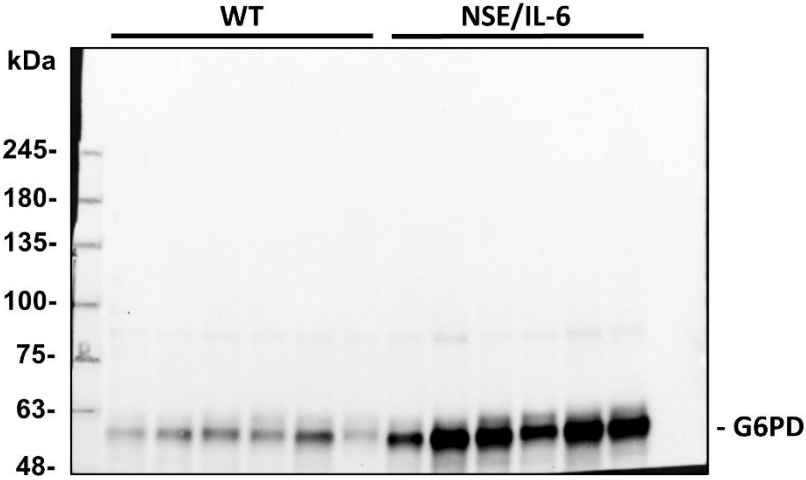

(a)

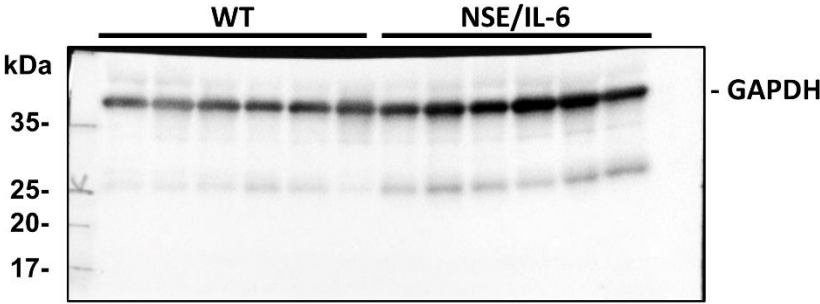

(b)

**Figure S3.** Western Blot analysis of G6PD (a) and GAPDH (b) proteins in wild type (WT) and NSE/IL-6 transgenic mice. Cropped bands reported as representative images are shown in Figure 1(e).
